# Supplementary material
Source: PubMed Central journal article supplement (PMC33156)
Supplement: pnas_240431598_1.pdf [file pnas_240431598_1.pdf]

Table 6.  $\rho$ -independent terminators in *Escherichia coli*

| Sequence                                                         | Name                      | Address | $\pm$ | Reference                         |
|------------------------------------------------------------------|---------------------------|---------|-------|-----------------------------------|
| CGTTAATCCGCAAATAACGT <u>AAAAACCCGCTTCGGCGGGTTTTTTT</u> ATGGGGGA  | <i>rpoC t</i>             | 4187152 | +     | RNA polymerase operon (4)         |
| CAGTTTCACCTGATTTACGT <u>AAAAACCCGCTTCGGCGGGTTTTTG</u> CTTTTGAAGG | <i>M1-RNA</i>             | 3267812 | -     | RNA of RNase P (5)                |
| CGTACCCCAGCCACATTA <u>AAAAAGCTCGCTTCGGCGAGCTTTTTG</u> CTTTTCTGCG | <i>sup</i>                | 0695610 | -     | supBE tRNA operon (6)             |
| ACACTAATCGAACCCGGCTCAAAG <u>ACCCGCTGCGCGGGTTTTTT</u> TGCTGTAAAT  |                           | 1260102 | -     | Nucleotide synthesis (7)          |
| AGTAATCTGAAGCAACGT <u>AAAAAACCCGCCCGCGGGTTTTTT</u> ATACCCGTA     | <i>L17</i>                | 3437202 | -     | Ribosomal RNA operon (8)          |
| TCTCGCTTTGATGTAA <u>CAAAAAACCCGCCCGCGGGTTTTTTG</u> TATCTGCT      | <i>rpm</i>                | 3808820 | -     | Ribosome rpm operon (9)           |
| GAGTAAGTTGCCATTTGCCCTCCGCTGCGCGGGGGCTTTTAA <u>ACCGGCAGGA</u>     | <i>t2</i>                 | 3306624 | -     | Polynucleotide phosphorylase (10) |
| CGATTGCCTTGTGAAG <u>CCGGAGCGGGAGACTGCTCCGCTTTTT</u> AGTATCTATTC  | <i>deo t</i>              | 4619189 | +     | deo operon (11)                   |
| CGTAAAGAAATCAGATACCCGCCCGCTAATGAGCGGGCTTTTTT <u>TGAACAAAA</u>    | <i>trp a</i>              | 1321015 | -     | tryptophan synthesis (12)         |
| GCGCAGTTAATCCACAGCCCGCAGTTCGGCTGGCGGCATTTAACTTTCTTTAA            | <i>trp t</i>              | 1314395 | -     | tryptophan synthesis (13)         |
| AAATCAGGCTGATGGCTGGTGACTTTTTAGTCA <u>CCAGCCTTTTT</u> CGCTGTAAAG  | <i>rplL t</i>             | 4178530 | +     | Ribosomal proteins L7/L12 (14)    |
| AGGAAACAGCA <u>AAAAACCCGCCCGCTGACAGTGC</u> GGGTTTTTTTCGACCAA     | <i>thr a</i>              | 0000263 | +     | threonine operon (15)             |
| AGCAGCAGTCAA <u>AAAAACCCGCCCGCTGACAGTGC</u> GGGTTTTTTTCGCCCCGAA  | <i>leu a</i>              | 0083564 | -     | leucine synthesis (16)            |
| CCCGTTGATCACCCATTCCAG <u>CCCTCAATCGAGGGCTTTTT</u> TTTGCCAGGC     | <i>pyrBI a</i>            | 4469985 | -     | pyrimidine synthesis (17)         |
| ACACGATTCCAA <u>ACCCGCCCGCGCAAACCGGGCGGGTTTT</u> TCGTTAAGCAC     | <i>ilvB a</i>             | 3850449 | -     | ilvB operon (18)                  |
| GAAACGGAAACAGCGCCTGA <u>AGCCTCCAGTGGAGGCTTTTT</u> TTGTATGCGCG    | <i>pheS a</i>             | 1797160 | -     | Phenylalanyl-tRNA synthetase (19) |
| CTTAAGAACTAAG <u>ACCCGCCCGCAAAGTCCGGGGTTTTTT</u> TGACCTTAA       | <i>ilvGEDA a</i>          | 3948053 | +     | ilvGEDA operon (20)               |
| CCGCCCTGCCAGAAAT <u>ATCCTTAGCGAAACGTAAGGA</u> TTTTTTTATCTGAAA    | <i>rrnC t</i>             | 3944645 | +     | Ribosomal RNA operon (21)         |
| CATCAAATAAAACAAAGGCTCAGTCGGAAGACTGGGCCTTTTTGTTTTATCTGTT          | <i>rrnD t</i>             | 3421006 | +     | Ribosomal RNA operon (22)         |
| TCCGCCACTTATTAAGAAGCCTCGAGTTAA <u>CGCTCGAGGTTTT</u> TTTTCGTCTGTA | <i>rrnF (G) t</i>         | 0228998 | +     | Ribosomal RNA operon (23)         |
| GCATCGCCAATGTAATCCGGCCCGCCTATGGCGGGCGTTTTGTATGGAACCA             | <i>frdB t</i>             | 4376529 | -     | Fumarate reductase (24)           |
| TGAATATTTAGCCGCCAGTCA <u>GTAATGACTGGGGCTTTTT</u> TATTGGGCAGAA    | <i>spot42-RNA</i>         | 4047542 | +     | spot42 RNA (25)                   |
| ATTCAGTAAGCAGAAAGTCAA <u>AGCCTCCGAGCGGAGCTTTTT</u> GACTATTACTCA  | <i>tonB t</i>             | 1309824 | +     | Membrane protein (26)             |
| AGAAACAGCAACAATCCAA <u>ACCCGCCCGCTTCAGCGGGTTTT</u> TTCTGCTTTTCT  | <i>glnS T</i>             | 0707159 | +     | Glutamyl-tRNA synthetase (27)     |
| CTGGCATAAGCCAGTTGA <u>AGAGGGAGCTAGTCTCCCTTTTT</u> CGTTTCAACGCC   | <i>rplT t</i>             | 1797371 | -     | Ribosome protein L20 (19)         |
| GCATCGCCAATGTAATCCGGCCCGCCTATGGCGGGCGTTTTGTATGGAACCA             | <i>ampC a</i>             | 4376529 | -     | $\beta$ -lactamase (28)           |
| TGCGAAGACGAACAATA <u>AGGCCTCCAAATCGGGGGCTTTTT</u> TATTGATAACA    | <i>phe a</i>              | 2735697 | +     | Phenylalanine operon (29)         |
| ACGCATGAGAAAGCCCGGAAGATCAC <u>CTCCGGGGCTTTTT</u> TATTGCGCGGT     | <i>hisG a</i>             | 2088121 | +     | ATP synthesis (30)                |
| CATCAAATAAAACGAAAGGCTCAGTCGAAAGACTGGGCCTTTTCGTTTTATCTGTT         | <i>rrnB t<sub>1</sub></i> | 4169333 | +     | Ribosomal RNA operon (31, 32)     |
| GGCATCAAATTAAGCAGAAAGCCATCCTGACGGATGGCCTTTTTGCGTTTCTACA          | <i>rrnB t<sub>2</sub></i> | 4169493 | +     | Ribosomal RNA operon (31, 32)     |
| AATTAATGTGAGTTAGCTCACTCATTAGGCACCCAGGCTTTACACTTATGCTT            | <i>lacI tII</i>           | 0365588 | -     | Lactose synthesis (33)            |
| CTTTTTGGCGGAGGGCTTGCCTTCTCCGCCAACTATTTTTACGCGGGCGGT              | <i>wvrD a</i>             | 3995538 | +     | DNA helicase II (34)              |

These terminators are taken primarily from Brendel *et al.* (1), are oriented in the reading direction, and aligned at the poly(T) stretch. The palindrome is underlined. The beginning and end of the selected sequences have no absolute meaning but simply follow the convention of d'Aubenton *et al.* (2). The address identifies the location in the standard *E. coli* genome (3) of the leftmost nucleotide in the table.

- Brendel, V., Hamm, G. H. & Trifonov, E. N. (1986) *J. Biomol. Struct. Dyn.* **3**, 705-723.
- d'Aubenton, Y., Brody, J. & Thermes, C. (1990) *J. Mol. Biol.* **216**, 835-858.
- E. coli* K-12 MG 1655, ftp://ncbi.nlm.nih.gov/genbank/genomes/bacteria/Ecoli/ecoli.ptt (1999); ftp://ncbi.nlm.nih.gov/genbank/genomes/bacteria/Ecoli/ecoli.fna (1999); http://www.ncbi.nlm.nih.gov/BLAST (1999).
- Squires, C., Krainer, A., Barry, G., Shen, W.-F. & Squires, C. L. (1981) *Nucleic. Acids Res.* **9**, 6827-6840.
- Sakamoto, H., Kimura, N. & Shimura, Y. (1983) *Proc. Natl. Acad. Sci. USA* **80**, 6187-6191.
- Nakajima, N., Ozeki, H. & Shimura, Y., (1982) *J. Biol. Chem.* **257**, 11113-11120.

- Hove-Jensen B., Harlow, K. W., King, C. J. & Switzer, R. L. (1986) *J. Biol. Chem.* **261**, 6765-6771.
- Bedwell, D., Davis, G., Gosink, M., Post, L., Nomura, M., Kestler, H., Zengel, J. M. & Lindahl, L. (1985) *Nucleic. Acids Res.* **13**, 3891-3903.
- Lee, J. S., An, G., Friesen, J. D. & Isono, K., (1981) *Mol. Gen. Genet.* **184**, 218-223.
- Regnier, P., Grunberg-Manago, M. & Portier, C. (1982) *J. Biol. Chem.* **262**, 63-68.
- Larsen, J. E., Albrechtsen, B. & Valentin-Hansen, P. (1987) *Nucleic. Acids Res.* **15**, 5125-5140.
- Lee, F., Bertrand, K., Bennett, G. & Yanofsky, C. (1978) *J. Mol. Biol.* **121**, 193-217.
- Wu, A. M., Christie, G. E. & Platt, T. (1981) *Proc. Natl. Acad. Sci. USA* **78**, 2913-2917.
- Ralling, G. & Linn, T. (1984) *J. Bacteriol.* **158**,

- 279-285.
15. Gardner, J. F. (1979) *Proc. Natl. Acad. Sci. USA* **76**, 1706-1710.
  16. Wessler, S. R. & Calvo, J. M. (1981) *J. Mol. Biol.* **149**, 579-597.
  17. Turnbough, C. L., Hicks, K. L. & Donahue, J. P. (1983) *Proc. Natl. Acad. Sci. USA* **80**, 368-372.
  18. Frieden, D., Newman, T. & Freundlich, M. (1982) *Proc. Natl. Acad. Sci. USA* **79**, 6156-60.
  19. Fayat, G., Mayaux, J. F., Sacerdot, C., Fromant, M., Springer, M., Grunber-Manago, M. & Blanquet, S. (1983) *J. Mol. Biol.* **171**, 239-261.
  20. Lawther, R. P. & Hatfield, G. W. (1980) *Proc. Natl. Acad. Sci. USA* **77**, 1862-1866.
  21. Young, R. A. (1979) *J. Biol. Chem.* **254**, 12725-12731.
  22. Duester, G. L. & Holmes, W. M. (1980) *Nucleic. Acids Res.* **8**, 3793-3807.
  23. Sekiya, T., Mori, M., Takahashi, N. & Nishimura, S. (1980) *Nucleic. Acids Res.* **8**, 3809-3827.
  24. Grundstroem, T. & Jaurin, B. (1981) *Proc. Natl. Acad. Sci. USA* **79**, 1111-1115.
  25. Joyce, C. M. & Grindley, N. D. F. (1982) *J. Bacteriol.* **152**, 1211-1219.
  26. Postle, K. & Goode, R. F. (1983) *Proc. Natl. Acad. Sci. USA* **80**, 5235-5239.
  27. Cheung, A. Y. & Söll, D. (1984) *J. Biol. Chem.* **259**, 9953-9958.
  28. Jaurin, B., Grundstroem, T., Edlund, T. & Normark, S. (1981) *Nature (London)* **290**, 221-225.
  29. Zurawski, G., Brown, K. Killingly, D. & Yanofsky, C. (1978) *Proc. Natl. Acad. Sci. USA* **75**, 4271-4275.
  30. Verde, P., Frunzio, R., di Nocera, P. P., Blasi, F. & Bruni, C. B. (1981) *Nucleic. Acids. Res.* **9**, 2075-2086.
  31. Brosius, J., Dull, T. J., Sleeter, D. D. & Noller, H. F. (1991) *J. Mol. Biol.* **148**, 107-127.
  32. Brosius, J. (1984) *Gene* **27**, 161-172.
  33. Horowitz, H. & Platt, T. (1982) *J. Biol. Chem.* **257**, 11740-11746.
  34. Easton, A. M. & Kuser, S. R. (1983) *Nucleic. Acids Res.* **11**, 8625-8640.
